# Supplementary material for: Survival status and predictors of mortality among preterm neonates admitted in Bench Sheko Zone, Sheka Zone and Keffa Zone Governmental Hospitals, Southwest Ethiopia (2021): prospective follow-up study
Source: HighWire-hosted journal article supplement (doi:10.1136/bmjopen-2024-083897), 2024-04-01
Supplement: bmjopen-2024-083897supp001_data_supplement.pdf [file bmjopen-2024-083897supp001_data_supplement.pdf]

Supplementary File 1: Maternal and obstetrics related characteristics of preterm neonates and their mothers admitted in Intensive Care Unit of Bench Sheko, Kafa and Sheka zone Hospitals, South west Ethiopia, 2021

| Characteristics                     | Category         | Total N (%)<br>N=614 | Censored N (%)<br>N=414 | Death N (%)<br>N=200 |
|-------------------------------------|------------------|----------------------|-------------------------|----------------------|
| Pregnancy status                    | Single           | 470( 76.55 )         | 306 (65.11)             | 164(34.89)           |
|                                     | Multiple         | 144 ( 23.45)         | 108 (75.00 )            | 36(25.00)            |
| ANC visit                           | Yes              | 500 (81.43           | 355(71.00               | 145(29.00)           |
|                                     | No               | 114 (18.57)          | 59 (51.75 )             | 55(48.25)            |
| Number of ANC visit                 | < 4              | 342 (68.40)          | 227 (66.37)             | 115(33.63)           |
|                                     | ≥ 4              | 158 ( 31.60)         | 128 (81.01)             | 30(18.99)            |
| Maternal corticosteroid intake      | Yes              | 69 ( 13.69 )         | 50 (72.46 )             | 19(27.54)            |
|                                     | No               | 435 (86.31 )         | 305(70.11 )             | 130(29.89)           |
| Mode delivery                       | Cesarean section | 115(18.73 )          | 94 (81.74)              | 21(18.260            |
|                                     | Vaginal          | 499( 81.27)          | 320 (64.13 )            | 179(35.87)           |
| Presentation at delivery            | Cephalic         | 529( 86.16 )         | 353 (66.73)             | 176(33.27)           |
|                                     | Non-cephalic     | 85 ( 13.84)          | 61 (71.76 )             | 24(28.24)            |
| Parity                              | ≤ 1              | 298 ( 48.53 )        | 201 (67.45 )            | 97(32.55)            |
|                                     | ≥ 2              | 316( 51.47)          | 213 (67.41)             | 103(32.59)           |
| Chronic medical problems previously | No               | 568(92.51)           | 379(66.73)              | 189(33.27)           |
|                                     | Yes              | 46 ( 7.49 )          | 35 (76.09               | 11(23.91)            |
| HIV                                 | No               | 590 ( 96.09)         | 392(66.44 )             | 198(33.56)           |
|                                     | Yes              | 24(3.91)             | 22 (91.67)              | 2(8.33)              |
| DM                                  | No               | 608 (99.02           | 411 (67.60 )            | 197(32.40)           |
|                                     | Yes              | 6(0.98               | 3 (50.00 )              | 3(50.00)             |
| HTN                                 | No               | 597 (97.23           | 403 (67.50 )            | 194(32.50)           |
|                                     | Yes              | 17(2.77              | 11(64.71 )              | 6(35.29)             |

|                         |     |             |             |            |
|-------------------------|-----|-------------|-------------|------------|
| Obstetric complications | No  | 550( 89.58) | 373 (67.82) | 177(32.18) |
|                         | Yes | 64( 10.42)  | 41 (64.06)  | 23(35.94)  |

Supplementary File 2: Medical and surgical preterm related Complications characteristics of preterm neonates and their mothers

| Characteristics                               | Category | Total N (%)<br>N=614 | Censored N (%)<br>N=414 | Death N (%)<br>N=200 |
|-----------------------------------------------|----------|----------------------|-------------------------|----------------------|
| Sepsis                                        | no       | 144 (23.45)          | 108(75.00 )             | 36(25.000)           |
|                                               | Yes      | 470 (76.55)          | 306(65.11)              | 164(34.89)           |
| RDS                                           | No       | 220 ( 35.83)         | 175(79.55 )             | 45(20.45)            |
|                                               | Yes      | 394 (64.17)          | 239(60.66 )             | 155(39.34)           |
| did the neonate receive resuscitation service | Yes      | 370 ( 93.91)         | 229(61.89 )             | 141(38.11)           |
|                                               | No       | 24 ( 6.09)           | 10 (41.67)              | 14(58.33)            |
| Necrotizing enterocolitis                     | No       | 588 ( 95.77)         | 396(67.35)              | 192(32.65)           |
|                                               | Yes      | 26 ( 4.23 )          | 18 (69.23)              | 8(30.77)             |
| Jaundice                                      | No       | 533 (86.81)          | 361 (67.73)             | 172(32.27)           |
|                                               | Yes      | 81 ( 13.19)          | 53 (65.43)              | 28(34.57)            |
| Hypoglycemia                                  | No       | 495 ( 80.62)         | 337(68.08 )             | 158(31.92)           |
|                                               | Yes      | 119 ( 19.38)         | 77 (64.71 )             | 42(35.29)            |
| Hypothermia                                   | No       | 243 (39.58 )         | 147(60.49 )             | 96(39.51)            |
|                                               | Yes      | 371( 60.42)          | 267 (71.97 )            | 104(28.03)           |
| Perinatal asphyxia                            | No       | 506 ( 82.41)         | 352(69.57 )             | 154(30.43)           |
|                                               | Yes      | 108(17.59)           | 62 (57.41 )             | 46(42.59)            |
| Anemia                                        | No       | 600 ( 97.72 )        | 409 (68.17)             | 191(31.83)           |
|                                               | Yes      | 14 (2.28)            | 5 (35.71 )              | 9(64.29)             |

Supplementary File 3: Institutional and professional characteristics of preterm neonates and their mothers admitted in Intensive Care Unit of Bench Sheko, Kafa and Sheka zone Hospitals, South west Ethiopia, 2021

| Characteristics           | Category         | Total N (%)<br>N=614 | Censored N (%)<br>N=414 | Death N (%)<br>N=200 |
|---------------------------|------------------|----------------------|-------------------------|----------------------|
| neonate received KMC      | yes              | 274(44.63)           | 108(39.42 )             | 166(60.58)           |
|                           | No               | 340 (55.37 )         | 306 (90.00)             | 34(10.00)            |
| KMC service provided room | KMC beds in NICU | 172(62.77)           | 87(50.58)               | 85(49.42)            |
|                           | In separate room | 72(37.23)            | 43(59.72)               | 29(40.28)            |
| Level of NICU             | Second level     | 185 (30.13)          | 123 (66.49)             | 62(33.51)            |
|                           | Third level      | 429 (69.87)          | 291(67.83)              | 138(32.17)           |

Supplementary File 4: Cox-Snell residual, Nelson -Aalen cumulative hazard graph on preterm neonates

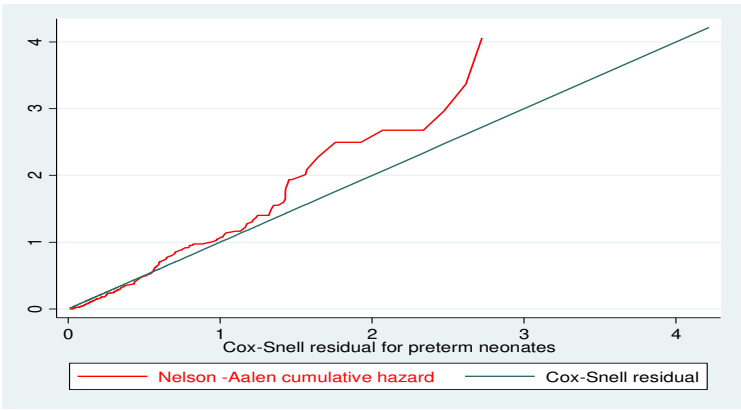

**English Version Questionnaire**

**Instruction:** Circle the correct and choose for closed ended questions and write on the space provided for open ended questions

Code number \_\_\_\_\_ Name of hospital \_\_\_\_\_

| <b>Data collection tools for survival and predictors of mortality among preterm neonates in Bench Sheko, Sheka and Keffa Zone Governmental Hospitals</b> |                                                                       |                                                      |                        |
|----------------------------------------------------------------------------------------------------------------------------------------------------------|-----------------------------------------------------------------------|------------------------------------------------------|------------------------|
| <b>Part one: Maternal and neonatal socio demographic related variables</b>                                                                               |                                                                       |                                                      |                        |
| <b>Q.no</b>                                                                                                                                              | <b>Questions</b>                                                      | <b>Response column</b>                               | <b>Skip column</b>     |
| 101                                                                                                                                                      | Date of birth                                                         | ___/___/___ days/month(/years)                       |                        |
| 102.                                                                                                                                                     | Date of admission (Day/Month/Year)                                    | _____                                                |                        |
| 103                                                                                                                                                      | Age of the neonate at admission                                       | _____ minutes/<br>hours/days                         |                        |
| 104                                                                                                                                                      | Sex                                                                   | Male<br>Female                                       |                        |
| 105                                                                                                                                                      | Place of delivery                                                     | Home<br>Health institution (hospital, health centre) |                        |
| 106                                                                                                                                                      | Maternal age                                                          | _____ years                                          |                        |
| 107                                                                                                                                                      | Maternal residency                                                    | Urban<br>Rural                                       |                        |
| <b>Part two: Neonatal related variables</b>                                                                                                              |                                                                       |                                                      |                        |
| 201                                                                                                                                                      | Birth weight (in gram).                                               | _____                                                |                        |
| 202                                                                                                                                                      | Gestational age at birth                                              | _____ weeks                                          |                        |
| 203                                                                                                                                                      | Had received Kangaroo mother care                                     | A. Yes<br>B. No                                      |                        |
| 204                                                                                                                                                      | APGAR score after delivery                                            | A. Known<br>B. Unknown                               | If known skip to Q.206 |
| 205                                                                                                                                                      | If APGAR score unknown, did the neonate cried immediately after birth | A. Yes<br>B. No                                      |                        |

|      |                                                                                                                                                                  |                                                                                                    |                 |                                    |
|------|------------------------------------------------------------------------------------------------------------------------------------------------------------------|----------------------------------------------------------------------------------------------------|-----------------|------------------------------------|
| 206  | If the APGAR score known                                                                                                                                         | A. Score at 1 <sup>st</sup> min-____<br>B. Score at 5 <sup>th</sup> min-____                       |                 |                                    |
| 207. | Weight for gestational age at birth                                                                                                                              | A. Appropriate for gestational age<br>B. Small for gestational age<br>C. Large for gestational age |                 |                                    |
| 208. | Feeding status and type of the neonate                                                                                                                           | A. Formula feeding<br>B. Breast milk feeding<br>C. Not initiating any feeding at all               |                 | If formula and not skip to Q. 210. |
| 209. | If breast milk feeding, the time feeding initiated                                                                                                               | A. Within one hour<br>B. Between 1 and 2 hour<br>C. Greater than 2 hours                           |                 |                                    |
| 210  | If breast milk feeding, did neonate had Feeding difficulties                                                                                                     | A. Yes<br>B. No                                                                                    |                 | If no skip to 212                  |
| 211  | If yes to no,210 did the neonate get breast milk pumps for feeding in the NICU                                                                                   | A. Yes<br>B. no                                                                                    |                 |                                    |
| 212. | Had the neonate been diagnosed with preterm related medical and surgical neonatal complications <b>at admission</b> and at <b>each day of follow up period</b> ? | 1. Sepsis                                                                                          | A. Yes<br>B. No |                                    |
|      |                                                                                                                                                                  | 2. Respiratory distress syndrome                                                                   | A. Yes<br>B. No | If no skip to no,4                 |
|      |                                                                                                                                                                  | 3. If yes to no,2 did received oxygen                                                              | A. Yes<br>B. No |                                    |
|      |                                                                                                                                                                  | 4. Necrotizing enterocolitis (specify the grade____)                                               | A. Yes<br>B. No |                                    |
|      |                                                                                                                                                                  | 5. Perinatal Asphyxia specify the stage____)                                                       | A. Yes<br>B. No | If no skip to 7                    |
|      |                                                                                                                                                                  | 6. If yes to no,5 did the neonate get neonatal resuscitation (bag-and mask in NICU)                | A. Yes<br>B. No |                                    |
|      |                                                                                                                                                                  | 7. Pulmonary haemorrhage                                                                           | A. Yes<br>B. No |                                    |

|                                                              |                                                           |                                                                                     |                 |                         |
|--------------------------------------------------------------|-----------------------------------------------------------|-------------------------------------------------------------------------------------|-----------------|-------------------------|
|                                                              |                                                           | 8. pulmonary hypertension                                                           | A. Yes<br>B. No |                         |
|                                                              |                                                           | 9. Congenital anomalies(specify____)                                                | A. Yes<br>B. No |                         |
|                                                              |                                                           | 10. Jaundice                                                                        | A. Yes<br>B. No | If no skip to 12        |
|                                                              |                                                           | 11. if yes to no, 10 received phototherapy or Exchange transfusion                  | A. Yes<br>B. No |                         |
|                                                              |                                                           | 12. hypoxic ischemic encephalopathy (specify the grade_____)                        | A. Yes<br>B. No |                         |
|                                                              |                                                           | 13. Hypoglycaemia                                                                   | A. Yes<br>B. No |                         |
|                                                              |                                                           | 14. Hypothermia                                                                     | A. Yes<br>B. NO | If no skip to no 16     |
|                                                              |                                                           | 15. Did the neonate was received thermal care in NICU (radiant warmer, over heater) | A. Yes<br>B. no |                         |
|                                                              |                                                           | 16. Anemia                                                                          | A. Yes<br>B. No |                         |
|                                                              |                                                           | 17. Other specify_____                                                              |                 |                         |
| <b>Part three: Maternal and obstetric related predictors</b> |                                                           |                                                                                     |                 |                         |
| 301.                                                         | Parity of the mother                                      | _____                                                                               |                 |                         |
| 302.                                                         | Mother had antenatal care visit during pregnancy          | A. Yes<br>B. No                                                                     |                 | (If no skip to Q. 304). |
| 303.                                                         | If yes, write the number of visits                        | _____                                                                               |                 |                         |
| 304.                                                         | Mother had taken antenatal corticosteroid before delivery | A. Yes<br>B. No                                                                     |                 |                         |
| 305.                                                         | Mother had pregnancy induced hypertension (preeclampsia/  | A. Yes<br>B. No                                                                     |                 |                         |

|                                                          |                                                             |                                                                                                                               |                 |
|----------------------------------------------------------|-------------------------------------------------------------|-------------------------------------------------------------------------------------------------------------------------------|-----------------|
|                                                          | eclampsia)                                                  |                                                                                                                               |                 |
| 306.                                                     | Mother had chronic diseases                                 | HIV                                                                                                                           | A. Yes<br>B. No |
|                                                          |                                                             | HTN                                                                                                                           | A. Yes<br>B. No |
|                                                          |                                                             | DM                                                                                                                            | A. Yes<br>B. No |
|                                                          |                                                             | If other specify _____                                                                                                        |                 |
| 307.                                                     | Mother had obstetric complications during delivery          | A. Yes<br>B. No                                                                                                               |                 |
| 308.                                                     | Pregnancy type                                              | A. Multiple pregnancy<br>B. Single tone pregnancy                                                                             |                 |
| 309.                                                     | Mode of delivery                                            | A. SVD<br>B. C/S<br>C. Instrumental delivery                                                                                  |                 |
| 310.                                                     | Presentation at delivery                                    | A. Cephalic<br>B. Non cephalic                                                                                                |                 |
| <b>Part four: Institutional and professional factors</b> |                                                             |                                                                                                                               |                 |
| 401                                                      | Where does the KMC service provided                         | A. Designated space for KMC<br>B. KMC beds in NICU                                                                            |                 |
| 402                                                      | Level of NICU                                               | A. 1 <sup>st</sup> level<br>B. 2 <sup>nd</sup> level<br>C. 3 <sup>rd</sup> level                                              |                 |
| 403                                                      | Hospital level                                              | A. Primary<br>B. General<br>C. Referral or specialized                                                                        |                 |
| 404                                                      | Availability of resuscitation equipment                     | A. adequately available<br>B. available but not adequate<br>C. not available                                                  |                 |
| <b>Part five: final outcome status</b>                   |                                                             |                                                                                                                               |                 |
| 401                                                      | What was the end outcome status of neonate in the hospital? | A. Death<br>B. Referred<br>C. Left against medical advice<br>D. Discharged with improvement<br>E. Alive until 28 days in NICU |                 |

|     |                                     |                           |  |
|-----|-------------------------------------|---------------------------|--|
| 402 | When was the above outcome occurred | _____(days/months/years ) |  |
|-----|-------------------------------------|---------------------------|--|
